# Supplementary material for: Ratiometric red-emission fluorescence detection of Al3+in pure aqueous solution and live cells by a fluorescent peptidyl probe using aggregation-induced emission
Source: Royal Society of Chemistry journal article supplement (doi:10.1039/c8an01221k), 2018-01-01
Supplement: c8an01221k1.pdf [file c8an01221k1.pdf]

**Supplementary Information**

**Ratiometric Red-emission Fluorescent Detection of Al<sup>3+</sup> in Pure Aqueous Solution and Live Cells by Fluorescent Peptidyl Probe using Aggregation-Induced emission**

Lok Nath Neupane <sup>a</sup>, Pramod Kumar Mehta<sup>a</sup>, Semin Oh<sup>a</sup>, See-Hyoung Park<sup>b</sup>, Keun -Hyeung Lee<sup>a,\*</sup>

<sup>a</sup>Center for Design and Applications of Molecular Catalysts, Department of Chemistry and Chemical Engineering, Inha University, Incheon, 402-751, South Korea.

<sup>b</sup>Department of Bio and Chemical Engineering, Hongik University, Sejong 30016, South Korea.

Email address: leekh@inha.ac.kr

Fax number: +82-32-8675604

Phone number: +82-32-8607674

**Contents:**

|                                                                                                                                                         |     |
|---------------------------------------------------------------------------------------------------------------------------------------------------------|-----|
| DLS and CD measurements                                                                                                                                 | S3  |
| Determination of detection limit and dissociation constant                                                                                              | S3  |
| Measurement of Quantum yields                                                                                                                           | S3  |
| <b>Transmission Electron Microscopy (TEM) measurements</b>                                                                                              | S4  |
| <b>Scheme S1.</b> Synthetic scheme of <b>4</b>                                                                                                          | S5  |
| <b>Scheme S2.</b> Synthetic scheme of <b>1</b>                                                                                                          | S6  |
| <b>Figure S1.</b> HPLC chromatogram of <b>4</b>                                                                                                         | S7  |
| <b>Figure S2.</b> HRMS spectrum of <b>4</b>                                                                                                             | S8  |
| <b>Figure S3.</b> $^1\text{H}$ NMR of <b>4</b>                                                                                                          | S9  |
| <b>Figure S4.</b> $^{13}\text{C}$ NMR of <b>4</b>                                                                                                       | S10 |
| <b>Figure S5.</b> HPLC chromatogram of <b>1</b>                                                                                                         | S11 |
| <b>Figure S6.</b> HRMS spectrum of <b>1</b>                                                                                                             | S12 |
| <b>Figure S7.</b> $^1\text{H}$ NMR of <b>1</b>                                                                                                          | S13 |
| <b>Figure S8.</b> $^{13}\text{C}$ NMR of <b>1</b>                                                                                                       | S14 |
| <b>Figure S9.</b> Intensity ratio change ( $I_{600}/I_{535}$ ) of <b>1</b> by $\text{Al}^{3+}$                                                          | S15 |
| <b>Figure S10.</b> Fluorescence spectra of <b>1</b> with $\text{Al}^{3+}$ in the presence of $\text{Cu}^{2+}$ , $\text{Fe}^{3+}$ , and $\text{Cr}^{3+}$ | S16 |
| <b>Figure S11.</b> Non-linear least-squares fitting of the emission intensity vs $\text{Al}^{3+}$                                                       | S17 |
| <b>Figure S12.</b> Benesi-Hildebrand plot for the fitting of the emission intensity vs $\text{Al}^{3+}$                                                 | S18 |
| <b>Figure S13.</b> Reversibility study of <b>1</b> using EDTA                                                                                           | S19 |
| <b>Figure S14.</b> Partial $^1\text{H}$ NMR spectra of <b>1</b> with $\text{Al}^{3+}$                                                                   | S20 |
| <b>Figure S15.</b> UV-Visible absorption spectra of <b>1</b> with $\text{Al}^{3+}$                                                                      | S21 |
| <b>Figure S16.</b> Fluorescent response to $\text{Al}^{3+}$ with a different excitation wavelength                                                      | S22 |
| <b>Figure S17.</b> IR spectra of <b>1</b> with $\text{Al}^{3+}$                                                                                         | S23 |
| <b>Figure S18.</b> Fluorescence spectra of <b>1</b> (5 $\mu\text{M}$ ) with $\text{Al}^{3+}$ at pH 6.0                                                  | S24 |
| <b>Figure S19.</b> Linear relationship between the emission intensity ratio and $\text{Al}^{3+}$ in aqueous buffered solution                           | S25 |
| <b>Figure S20.</b> Fluorescence spectra of <b>1</b> with $\text{Al}^{3+}$ in tap water and ground water                                                 | S26 |
| <b>Figure S21.</b> Linear relationship between the emission intensity ratio and $\text{Al}^{3+}$ in tap water and ground water                          | S27 |
| <b>Figure S22.</b> Ratiometric response to $\text{Al}^{3+}$ in the presence of amino acids (100 $\mu\text{M}$ ) and biothiols                           | S28 |
| <b>Figure S23.</b> Ratiometric response to $\text{Al}^{3+}$ with increasing concentrations of biothiols                                                 | S29 |
| <b>Figure S24.</b> Emission intensity ratio changes of <b>1</b> by $\text{Al}^{3+}$ in the presence of citric acid                                      | S30 |
| <b>Figure S25.</b> Emission intensity ratio changes of <b>1</b> by $\text{Al}^{3+}$ in the presence of oxalic acid                                      | S31 |
| <b>Figure S26.</b> Emission intensity ratio changes of <b>1</b> by $\text{Al}^{3+}$ in the presence of ATP                                              | S32 |
| <b>Figure S27.</b> Cell viability study                                                                                                                 | S33 |
| <b>References</b>                                                                                                                                       | S34 |

## DLS measurement and CD measurement

The size distribution in an aqueous buffered solution (1 mM Tris, pH 7.0) was measured using a laser diffraction particle size analyzer (ELSZ, Otsuka Electronics, Osaka, Japan). The measurements were carried out by 90° dynamic light scattering at 25 °C.

Circular dichroism experiments were performed using JASCO 815 CD spectropolarimeter (Jasco, Tokyo, Japan). All the data were collected from 600 to 350 nm at a scan rate of 100 nm/min at 0.5 nm data intervals and are presented as an average of three successive scans unless specified.

## Determination of detection limit and dissociation constant

The detection limit of **1** to Al<sup>3+</sup> was calculated based on a fluorescence titration. To determine the S/N ratio, the fluorescence emission intensity ratio ( $I_{600}/I_{535}$ ) of 5 μM of **1** in aqueous solutions was measured 10 times, and the standard deviation of the blank measurements was determined. Three separate measurements of the emission intensity ratio were measured in the presence of increasing Al<sup>3+</sup> concentrations, and the mean intensity ratio was plotted as a function of the Al<sup>3+</sup> concentration to determine the slope. The detection limit was calculated using the following equation:

$$\text{Detection limit} = 3\sigma/m$$

where  $\sigma$  is the standard deviation of the intensity ratio of **1** in the absence of Al<sup>3+</sup>, and  $m$  is the slope of the emission intensity ratio ( $I_{600}/I_{535}$ ) of 5 μM of **1** as a function of the Al<sup>3+</sup> concentration.<sup>1</sup>

The dissociation constant was calculated based on the titration curve of the probe with metal ion. The fluorescence signal,  $F$ , is related to the equilibrium concentration of the complex (HL) between Host (H) and metal ion (L) by the following expression:

$$F = F_0 + \Delta F \times [\text{HL}]$$

$$[\text{HL}] = 0.5 \times [\text{K}_D + \text{L}_T + \text{H}_T - \{(-\text{K}_D - \text{L}_T - \text{H}_T)^2 - 4 \text{L}_T \text{H}_T\}^{1/2}]$$

where  $F_0$  is the fluorescence of the probe only and  $\Delta F$  is the change in fluorescence due to the formation of HL. The dissociation constant was determined by a nonlinear least square fit of the data with the equation.<sup>2</sup> The dissociation constant was calculated based on fluorescence titration curve of the probe with the metal ion using the modified Benesi-Hildebrand equation. The dissociation constant was calculated using the following equation.<sup>3,4</sup>

$$\text{Log}(I_x - I_0 / I_{\text{max}} - I_0) = n \times \text{log}[M] - \text{log}K_d$$

where  $I_0$  is the fluorescence of the probe only,  $I$  is the change in fluorescence due to the formation of complex,  $I_{\text{max}}$  is the final fluorescence emission intensity,  $M$  is the concentration of Al<sup>3+</sup> ions, and  $n$  is the slope.

### **Measurement of Quantum yields**

Fluorescence quantum yields of **1** in the presence and absence of  $\text{Al}^{3+}$  were obtained by using fluorescein as a standard. Each of the sample solution were prepared in distilled water and the absorbance were recorded in 10 mM tris buffer solution in different 10 mm quartz cell. The fluorescence spectrums of the solutions were recorded with the excitation wavelength of 470 nm and the relative fluorescence was determined by the area of the fluorescence emission. Where fluorescein used as a standard and its known quantum yield value is 0.91.<sup>5</sup> Finally, quantum yield of **1** in the absence and presence of  $\text{Al}^{3+}$  were calculated.<sup>6</sup>

### **Transmission Electron Microscopy (TEM) measurements**

Transmission electron microscopy (TEM) was performed using a Philips CM 200 operated at an acceleration voltage of 120 kV. The sample was prepared by dropping 5  $\mu\text{L}$  of the complex of **1** and  $\text{Al}^{3+}$  on a 300-mesh copper grid coated with carbon followed by staining with phosphotungstic acid (1 wt%). TEM grids were completely dried in vacuum desiccator before TEM measurements.

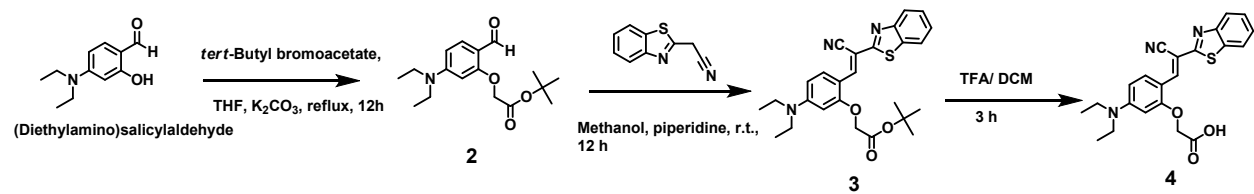

**Scheme S1.** Synthetic scheme of **4**

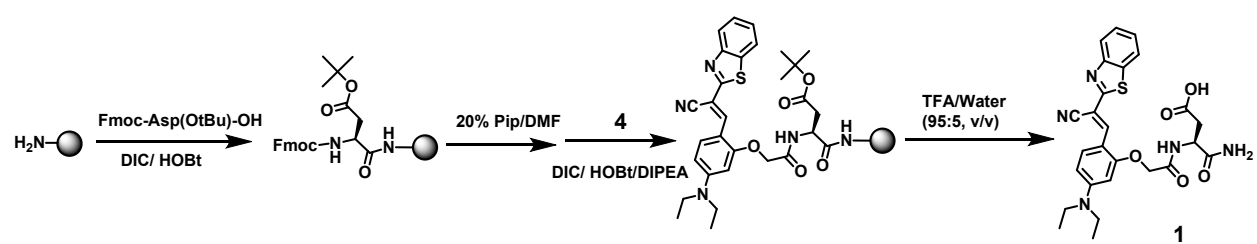

**Scheme S2.** Synthetic scheme of **1**

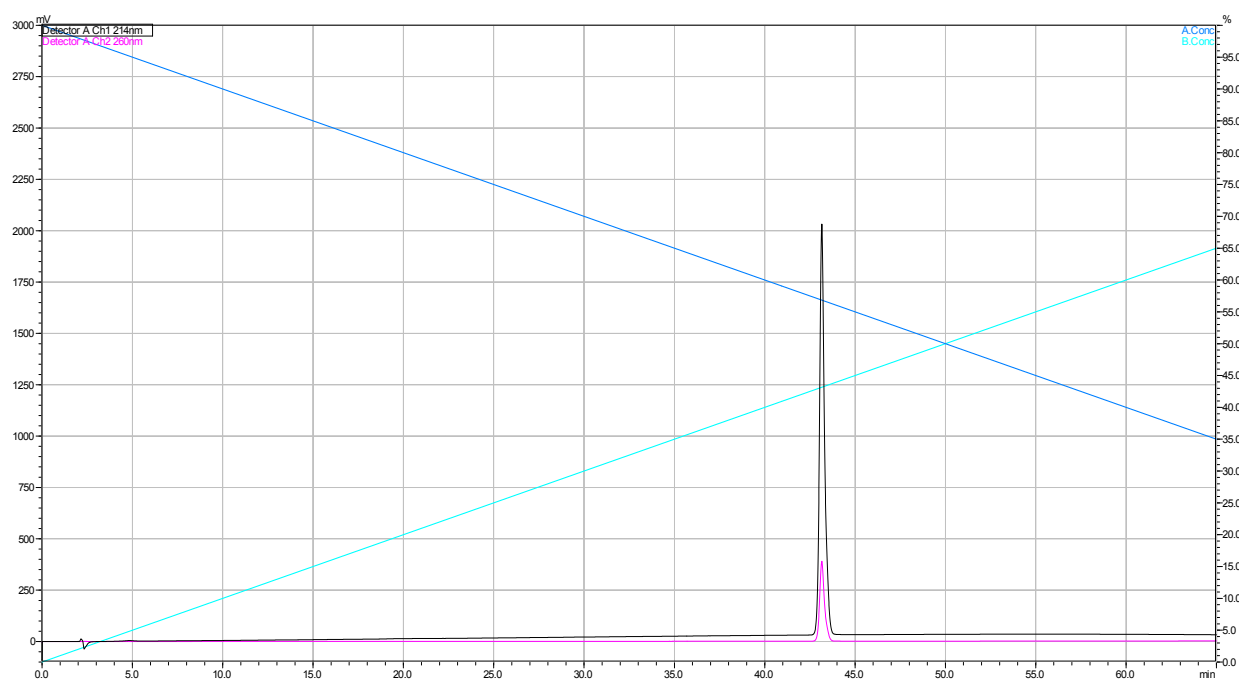

**Fig. S1.** HPLC chromatogram of **4**

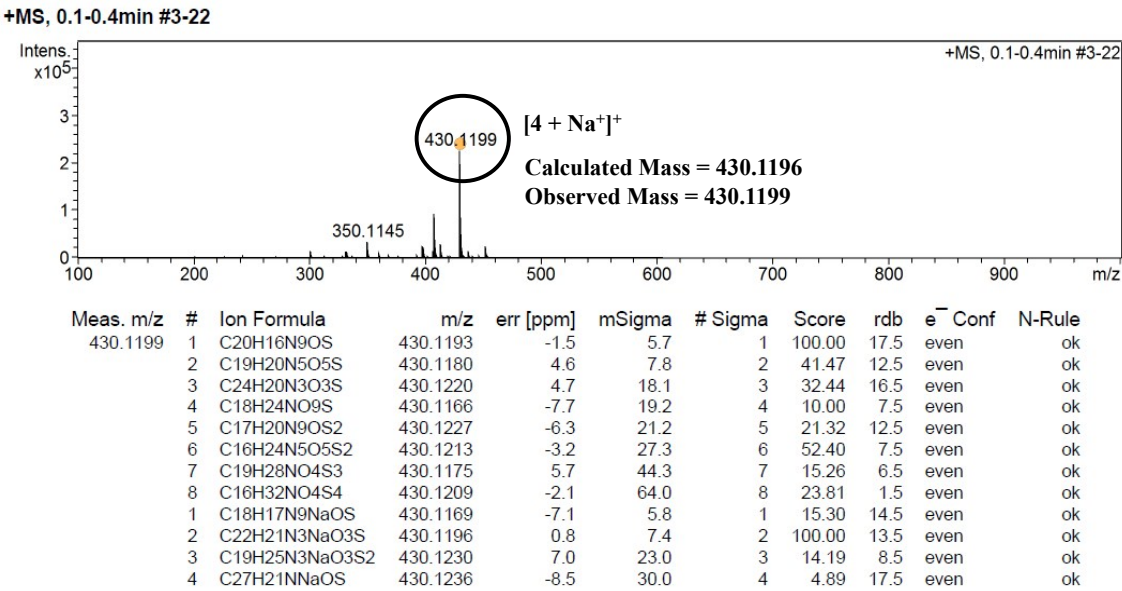

**Fig. S2.** HRMS (ESI-TOF) spectrum of **4**



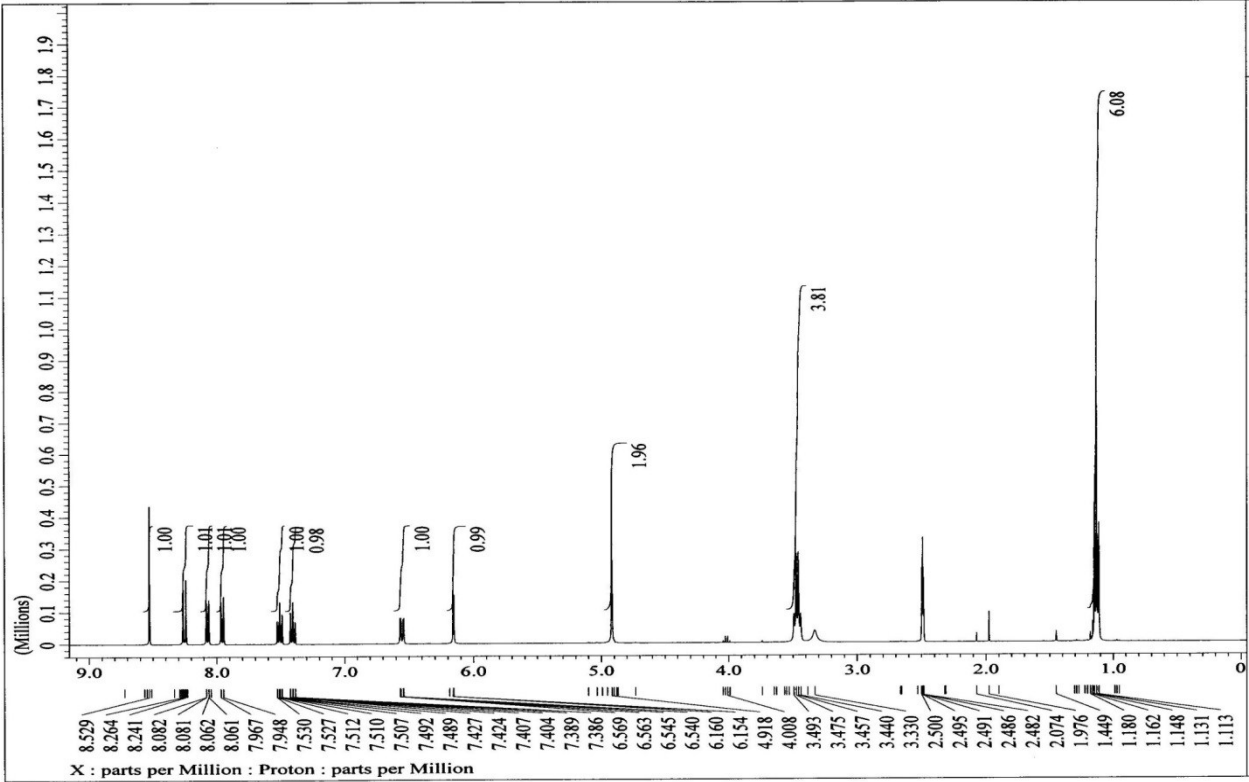

Fig. S3. <sup>1</sup>H NMR of 4

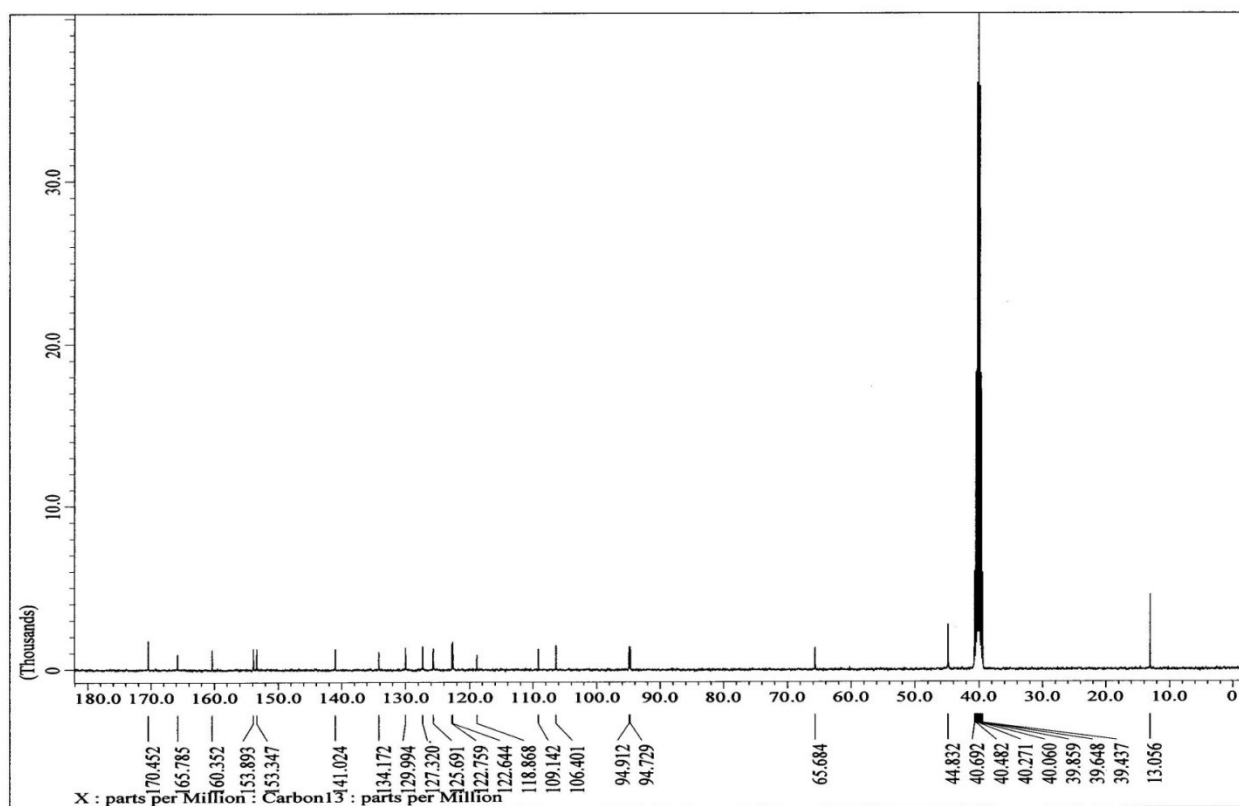

Fig. S4. <sup>13</sup>C NMR of 4

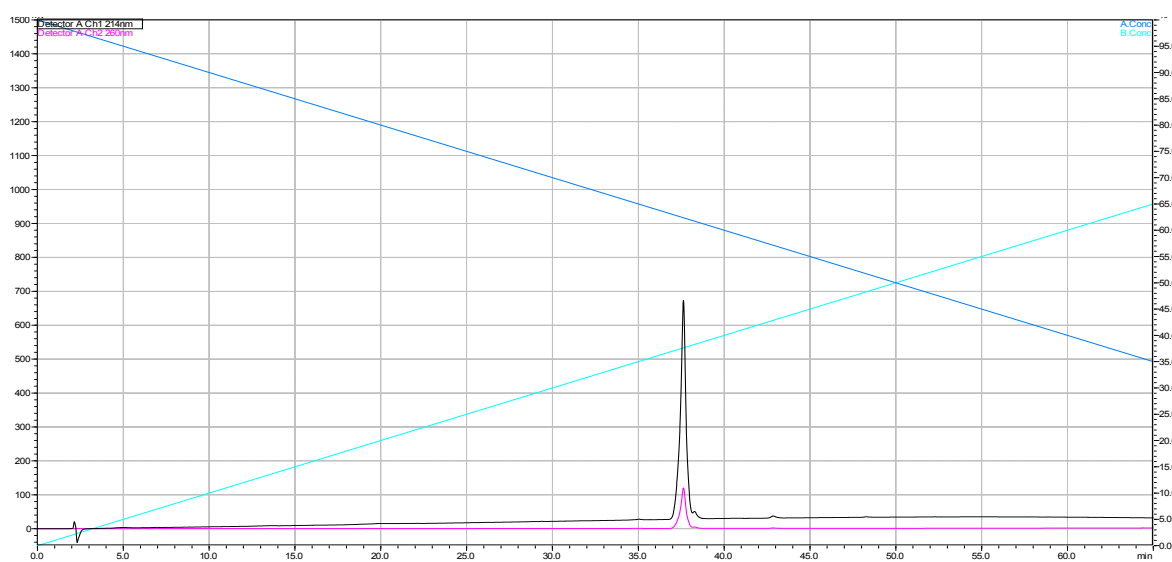

Fig. S5. HPLC chromatogram of **1**

+MS, 0.3-0.5min #19-28

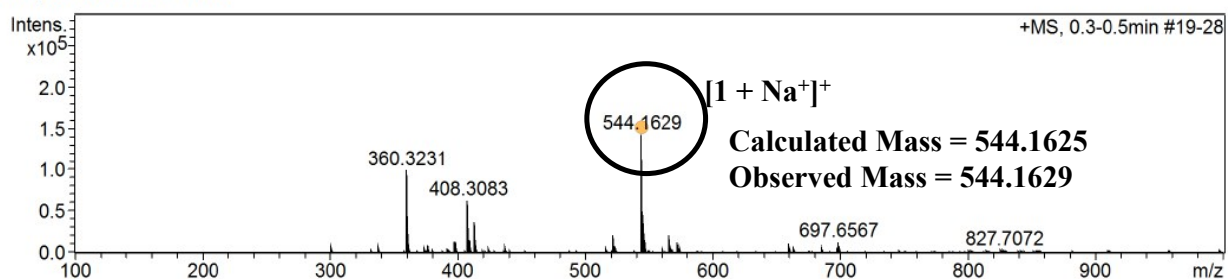

| Meas. m/z | # | Ion Formula   | m/z      | err [ppm] | mSigma | # Sigma | Score  | rdb  | e <sup>-</sup> Conf | N-Rule |
|-----------|---|---------------|----------|-----------|--------|---------|--------|------|---------------------|--------|
| 544.1629  | 1 | C29H22N9OS    | 544.1663 | -6.1      | 3.5    | 1       | 17.11  | 23.5 | even                | ok     |
|           | 2 | C28H26N5O5S   | 544.1649 | 3.6       | 7.4    | 2       | 52.83  | 18.5 | even                | ok     |
|           | 3 | C27H30NO9S    | 544.1636 | 1.2       | 17.8   | 3       | 100.00 | 13.5 | even                | ok     |
|           | 4 | C31H30NO4S2   | 544.1611 | -3.4      | 24.4   | 4       | 40.24  | 17.5 | even                | ok     |
|           | 5 | C28H34NO4S3   | 544.1644 | 2.8       | 41.8   | 5       | 33.66  | 12.5 | even                | ok     |
|           | 1 | C31H27N3NaO3S | 544.1665 | 6.6       | 4.1    | 1       | 14.77  | 19.5 | even                | ok     |
|           | 2 | C27H23N9NaOS  | 544.1638 | -1.7      | 8.5    | 2       | 97.71  | 20.5 | even                | ok     |
|           | 3 | C26H27N5NaO5S | 544.1625 | 0.8       | 19.4   | 3       | 100.00 | 15.5 | even                | ok     |
|           | 4 | C25H31NNaO9S  | 544.1612 | 3.3       | 27.6   | 4       | 47.14  | 10.5 | even                | ok     |
|           | 5 | C26H35NNaO4S3 | 544.1620 | -1.7      | 41.1   | 5       | 57.91  | 9.5  | even                | ok     |

Fig. S6. HRMS (ESI-TOF) spectrum of **1**

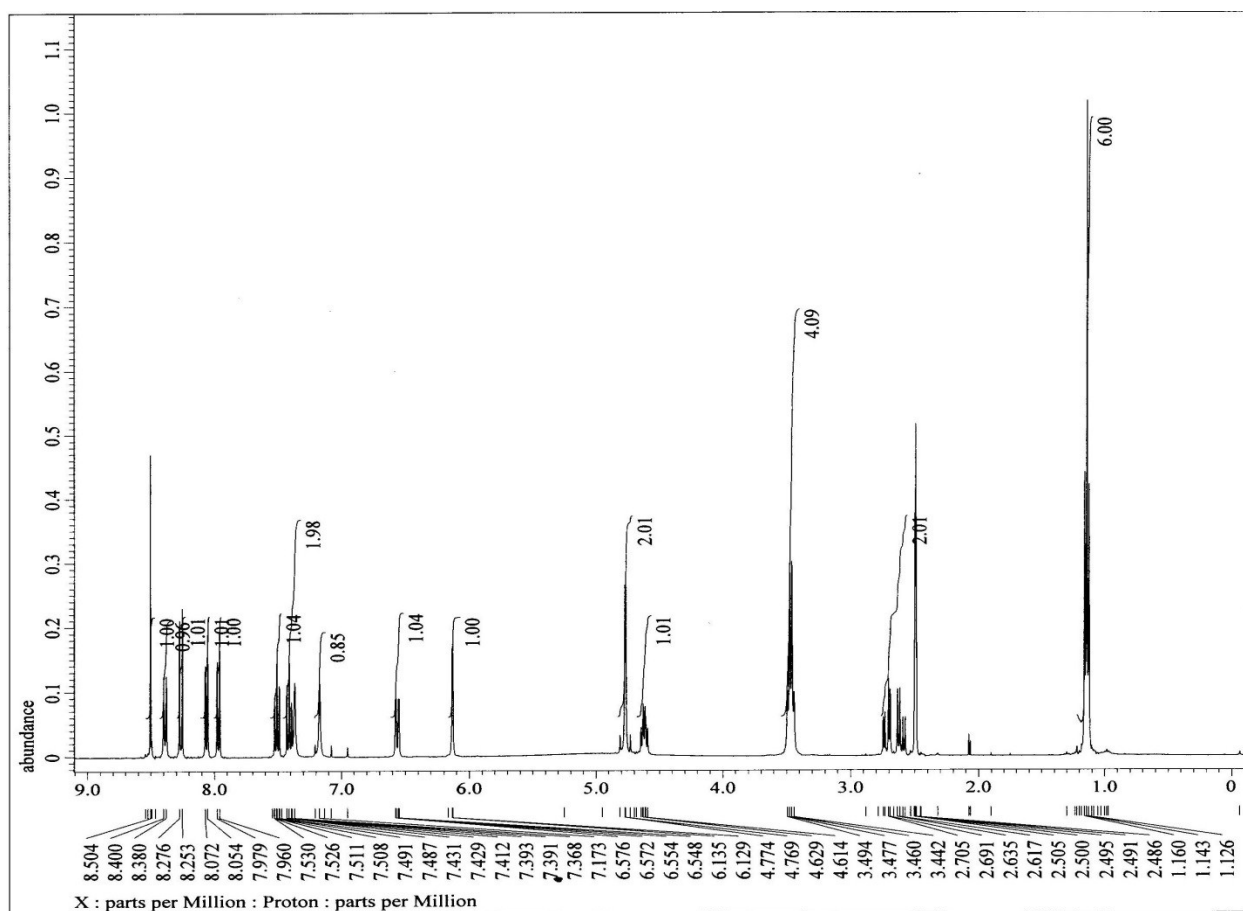

**Fig. S7.**  $^1\text{H}$  NMR of **1**

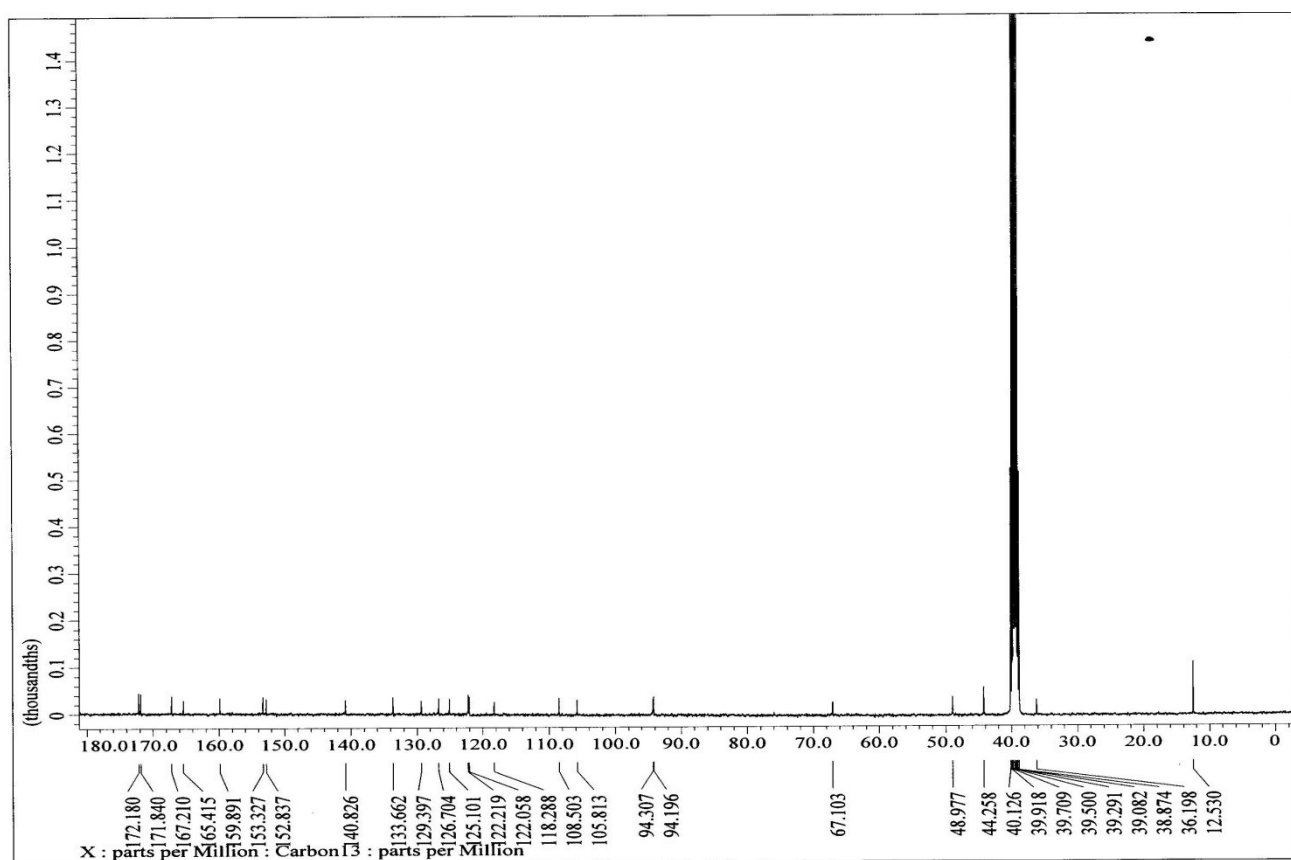

Fig. S8. <sup>13</sup>C NMR of 1

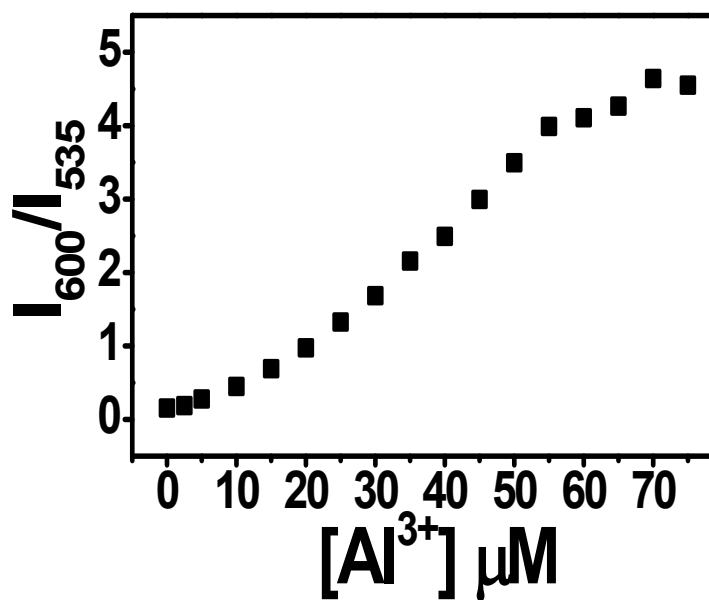

**Fig. S9.** Intensity ratio change ( $I_{600}/I_{535}$ ) of **1** (5  $\mu\text{M}$ ) as a function of  $\text{Al}^{3+}$  in aqueous buffered solution (10 mM Tris, pH 7.0) ( $\lambda_{\text{ex}} = 470 \text{ nm}$ ).



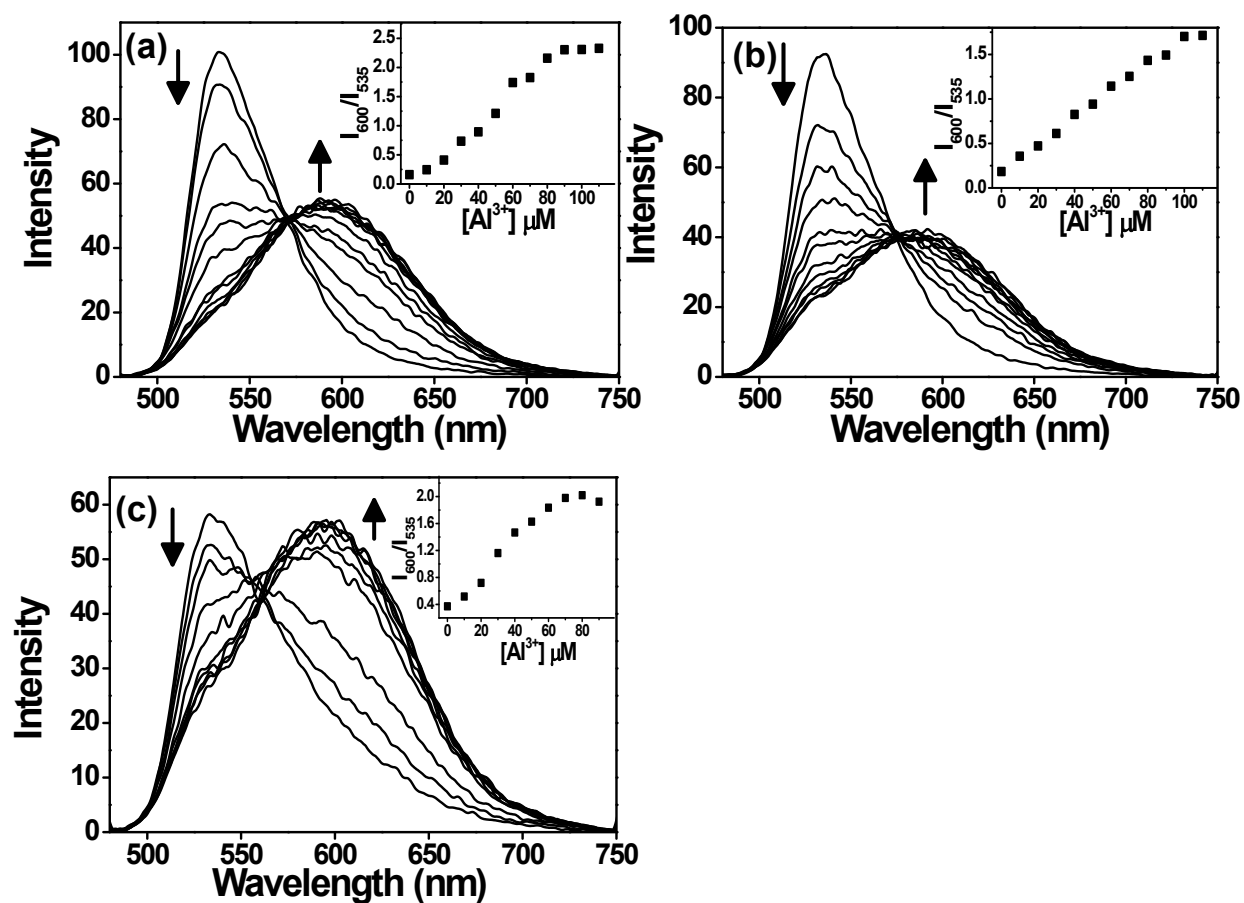

**Fig. S10.** Fluorescence emission spectra of **1** (5  $\mu\text{M}$ ) with increasing concentration of  $\text{Al}^{3+}$  in the presence of (a)  $\text{Cu}^{2+}$  (12 equiv), (b)  $\text{Cr}^{3+}$  (12 equiv) and (c)  $\text{Fe}^{3+}$  (12 equiv) in aqueous buffered solution (10 mM Tris, pH 7.0).

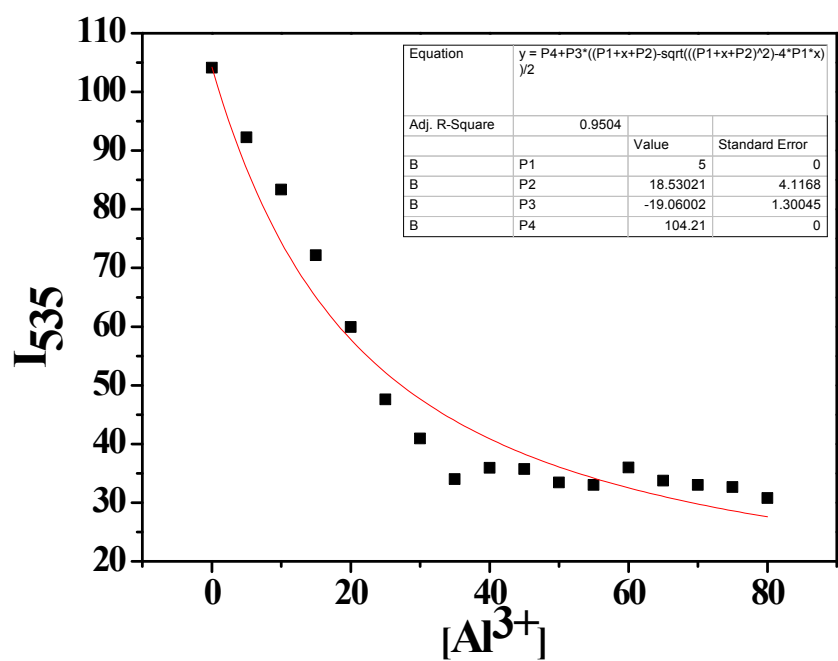

**Fig. S11.** Non-linear least-squares fitting of the emission intensity of **1** (5  $\mu$ M) with increasing concentration of  $Al^{3+}$  in aqueous buffered solution (10 mM Tris, pH 7.0).

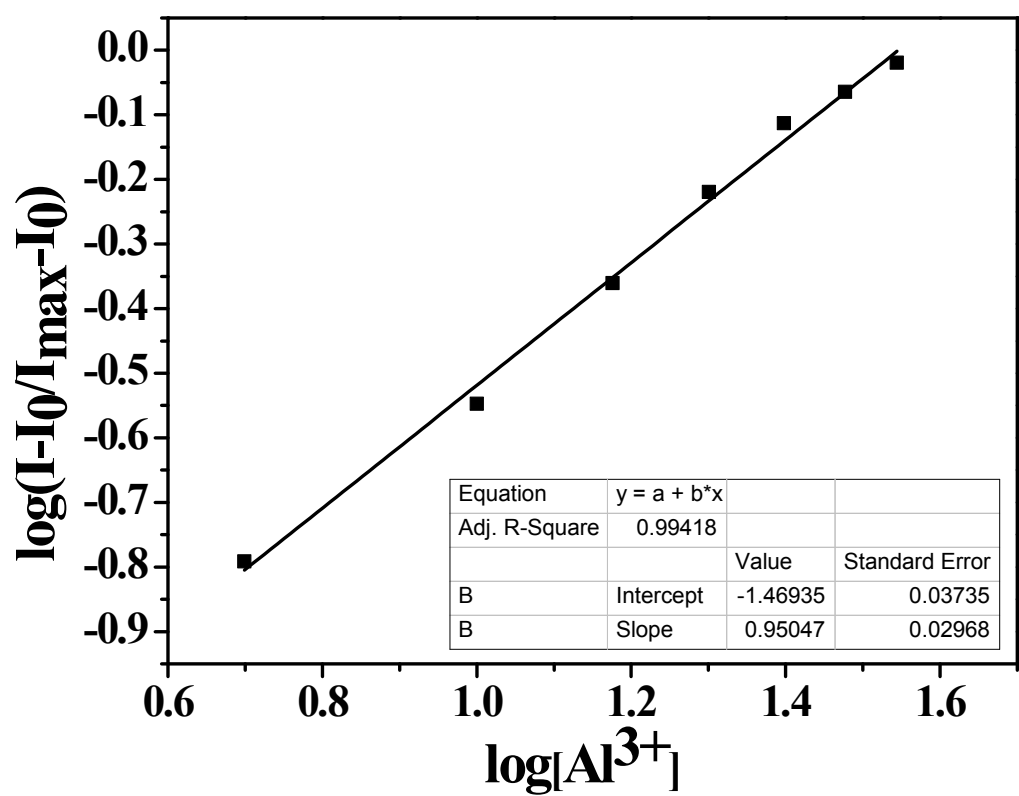

**Figure S12.** Benesi-Hildebrand plot for determination of the binding stoichiometry and binding constant of **1** (5  $\mu$ M) for  $Al^{3+}$  in aqueous buffered solution (10 mM Tris, pH 7.0). Emission intensity at 535 nm was used in the plot.

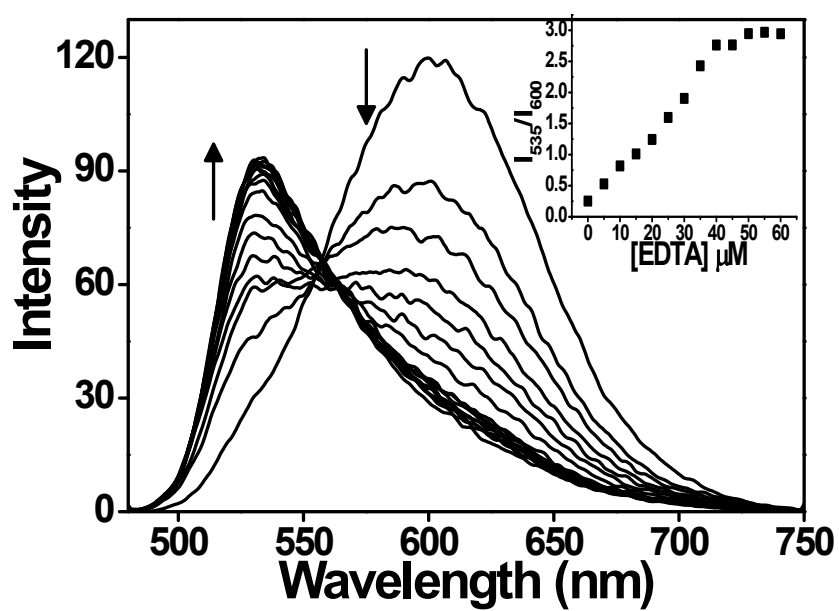

**Fig. S13.** Fluorescence emission spectra of **1** (5  $\mu\text{M}$ ) with  $\text{Al}^{3+}$  (12 equiv) in the presence of increasing concentration of EDTA in aqueous buffered solution (10 mM Tris, pH 7.0) ( $\lambda_{\text{ex}}$  = 470 nm, slit = 12/10 nm).

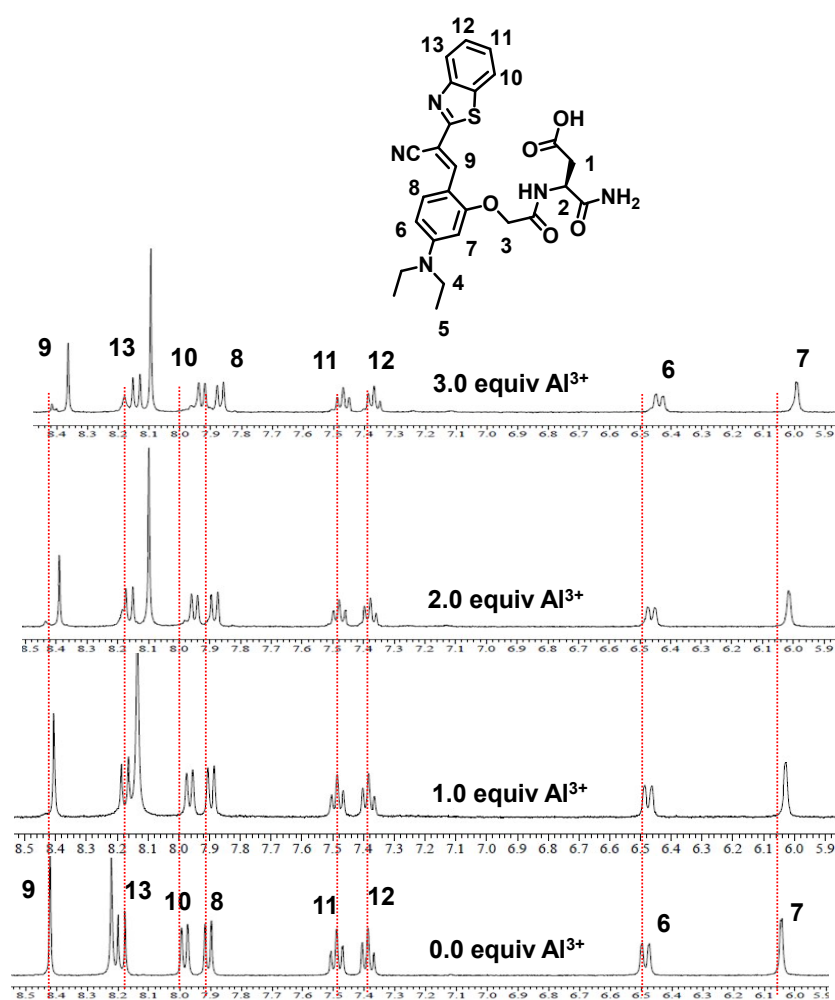

**Fig. S14.** Partial <sup>1</sup>H NMR spectra (400 MHz) of **1** (5 mM) with increasing concentration of Al<sup>3+</sup> in DMSO-*d*<sub>6</sub>/D<sub>2</sub>O (v/v = 4:1) containing 10 mM ammonium formate.

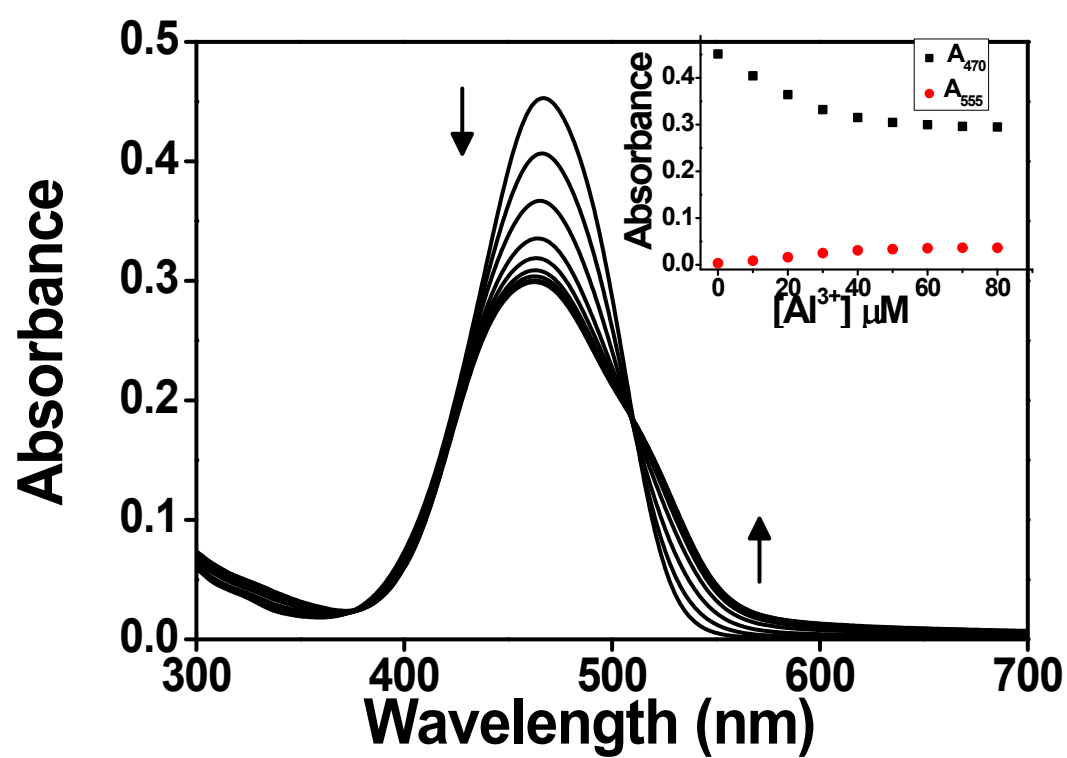

**Fig. S15.** UV-vis absorption spectra of **1** (5  $\mu\text{M}$ ) upon the gradual addition of  $\text{Al}^{3+}$  (0-80  $\mu\text{M}$ ) in aqueous buffered solution (10 mM Tris, pH 7.0).

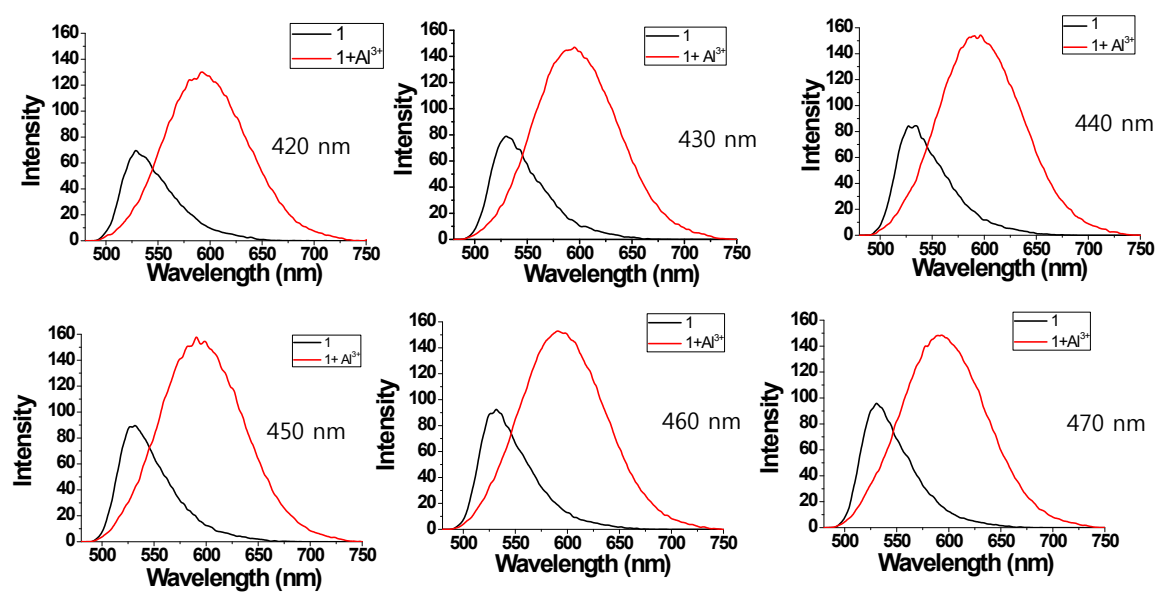

**Fig. S16.** Fluorescence spectra of **1** (5  $\mu\text{M}$ ) in the absence and presence of  $\text{Al}^{3+}$  (12 equiv) with a different excitation wavelength

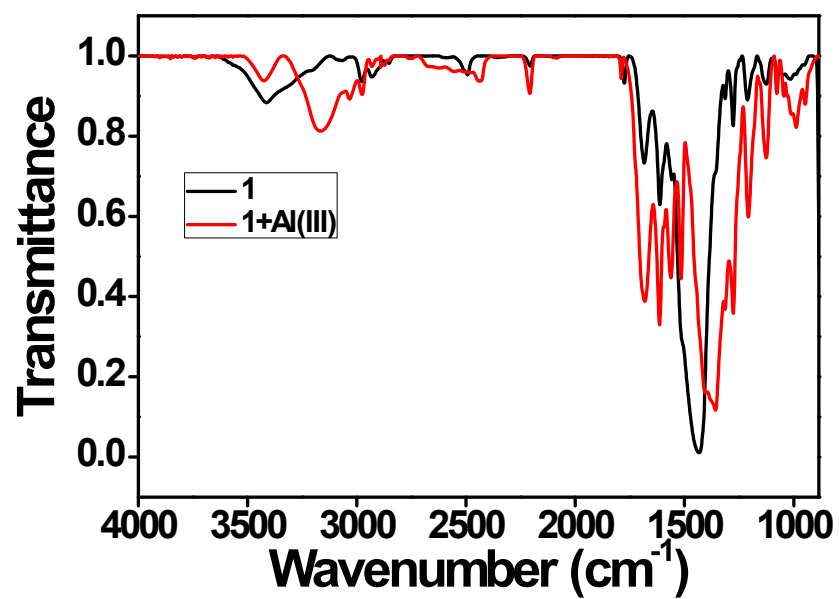

Fig. S17. IR spectra of **1** in the absence and presence of Al<sup>3+</sup>.



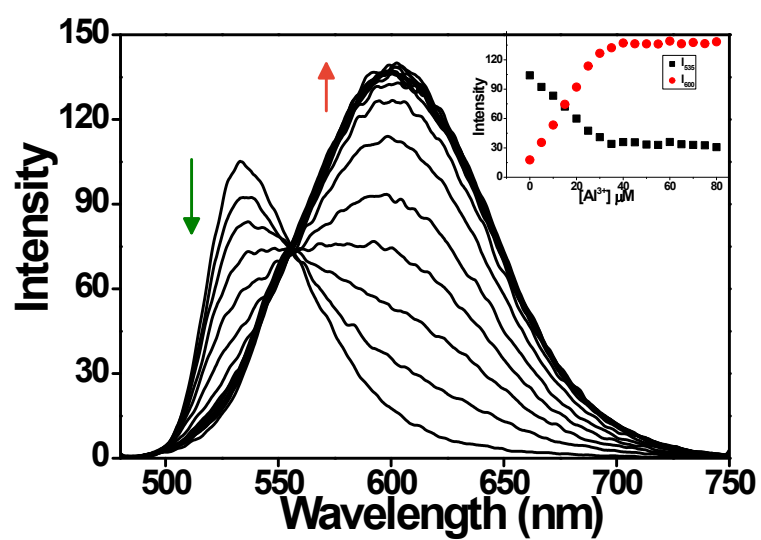

**Fig. S18.** Fluorescence spectra of **1** (5  $\mu\text{M}$ ) with increasing concentration of  $\text{Al}^{3+}$  in aqueous buffered solution (10 mM Hexamine buffer, pH 6.0).

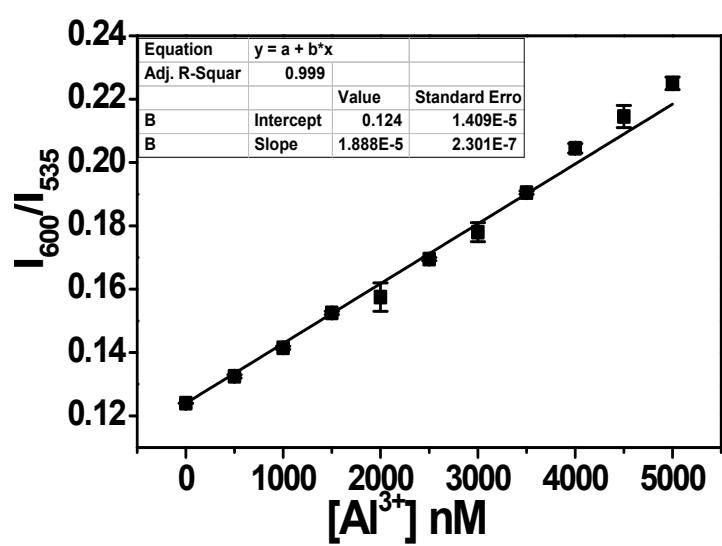

**Fig. S19.** Linear relationship between the emission intensity ratio ( $I_{600}/I_{535}$ ) of **1** (5  $\mu\text{M}$ ) and the concentration of  $\text{Al}^{3+}$  (0-5000 nM) in aqueous buffered solution (10 mM Tris, pH 7.0).

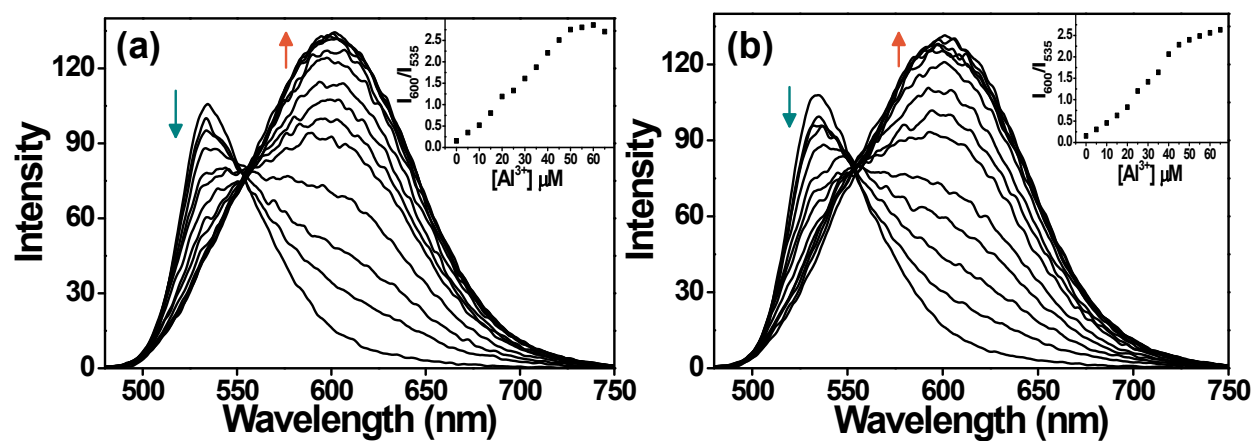

**Fig. S20.** Fluorescence emission spectra of **1** (5  $\mu\text{M}$ ) with increasing concentration of  $\text{Al}^{3+}$  (0–65  $\mu\text{M}$ ) in aqueous buffered solution (10 mM Tris, pH 7.0) containing (a) 10 % (v/v) tap water and (b) 10 % (v/v) ground water ( $\lambda_{\text{ex}} = 470$  nm).

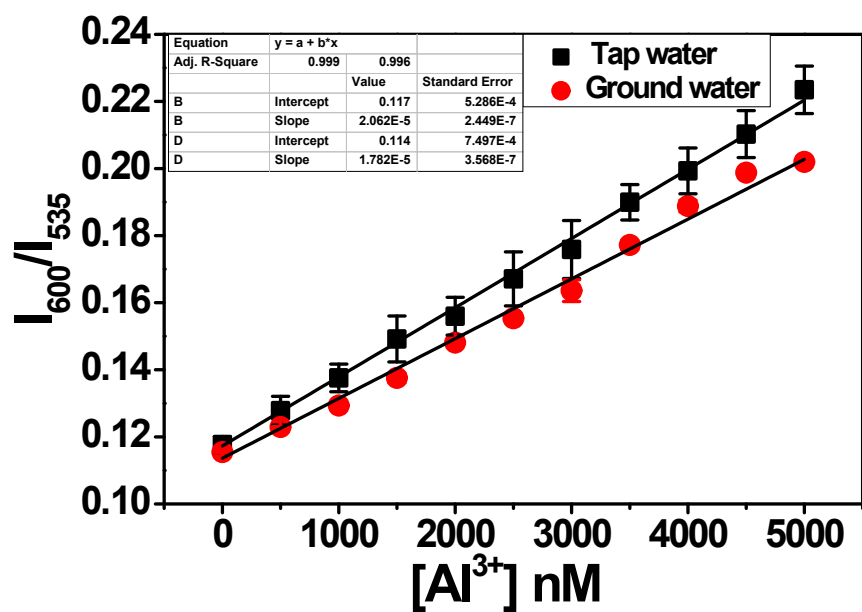

**Fig. S21.** Linear relationship between the emission intensity ratio ( $I_{600}/I_{535}$ ) of **1** (5  $\mu\text{M}$ ) and the concentration of  $\text{Al}^{3+}$  (0-5000 nM) in aqueous buffered solution (10 mM Tris, pH 7.0) containing 10 % (v/v) tap water and 10% (v/v) groundwater, respectively.

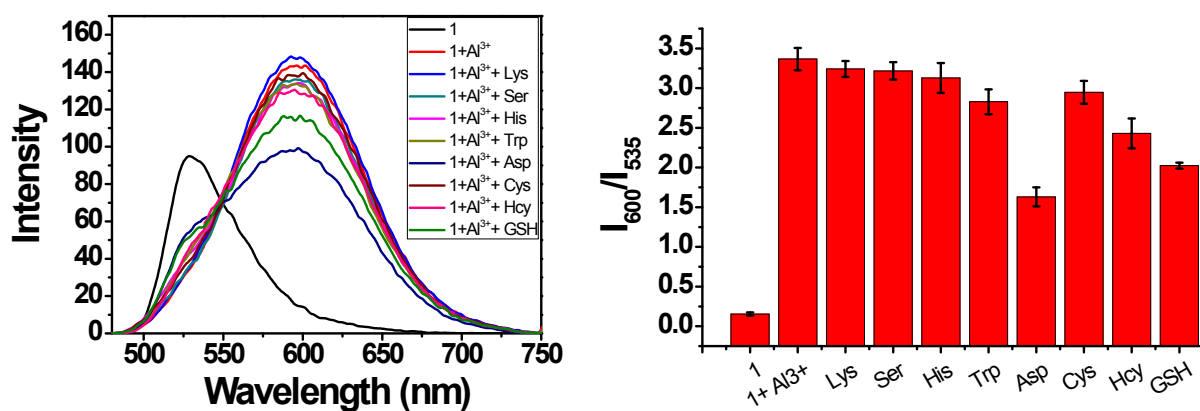

Fig. S22. Fluorescence emission spectra of **1** (5  $\mu\text{M}$ ) with  $\text{Al}^{3+}$  (12 equiv) in the presence of amino acids (100  $\mu\text{M}$ ) and biothiols (100  $\mu\text{M}$ ).

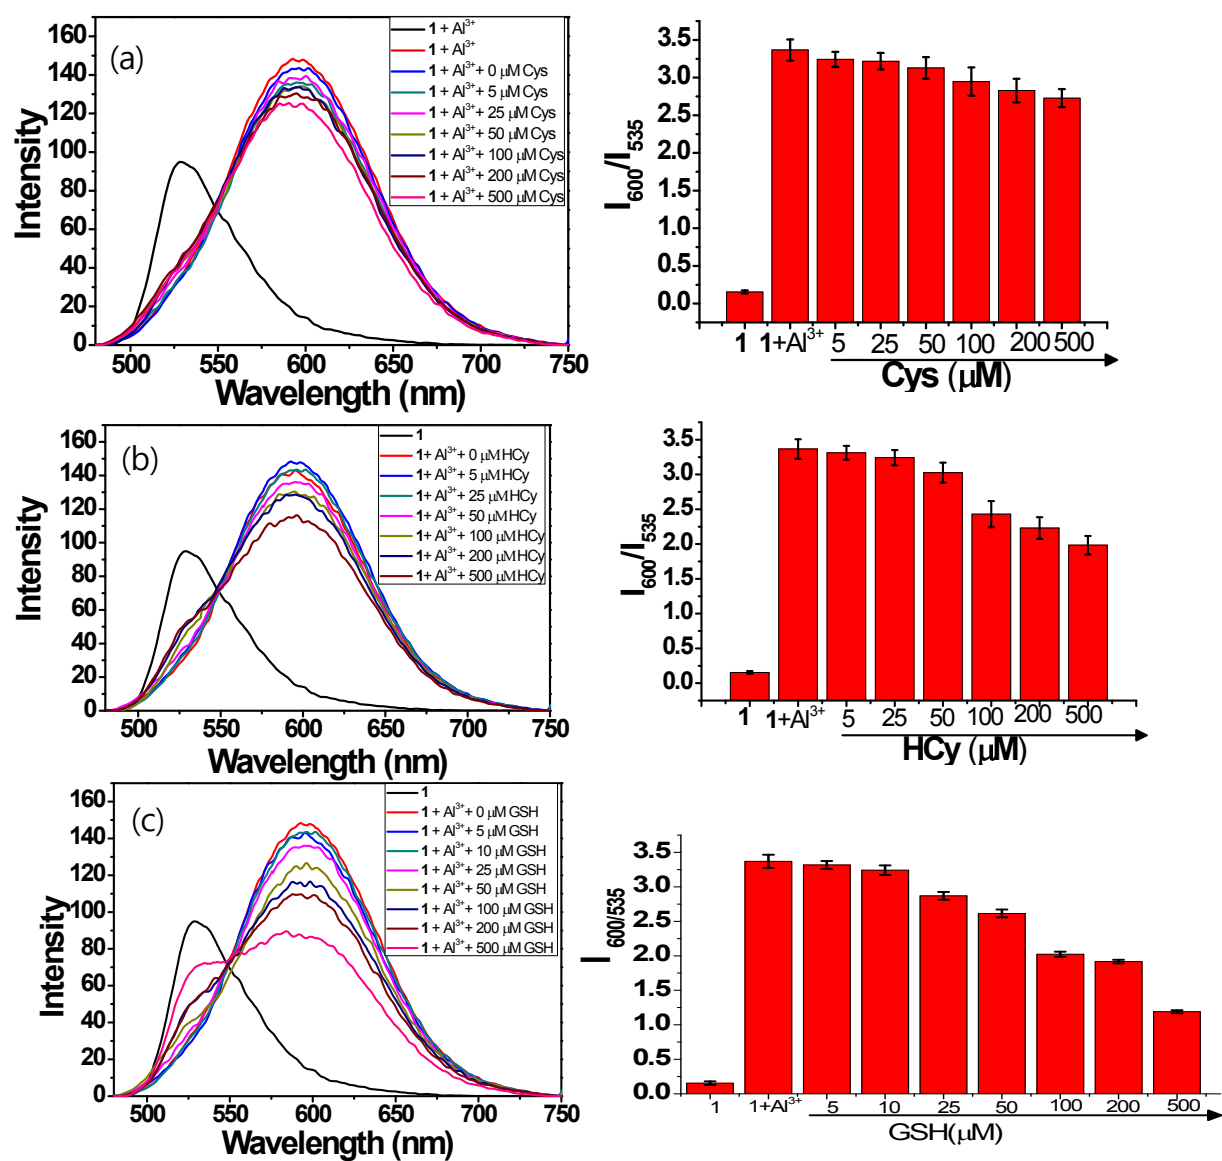

Fig. S23. Fluorescence emission spectra of **1** (5  $\mu\text{M}$ ) in the presence of  $\text{Al}^{3+}$  (12 equiv) with increasing concentration of (a) Cys, (b) Hcy, and (c) GSH.

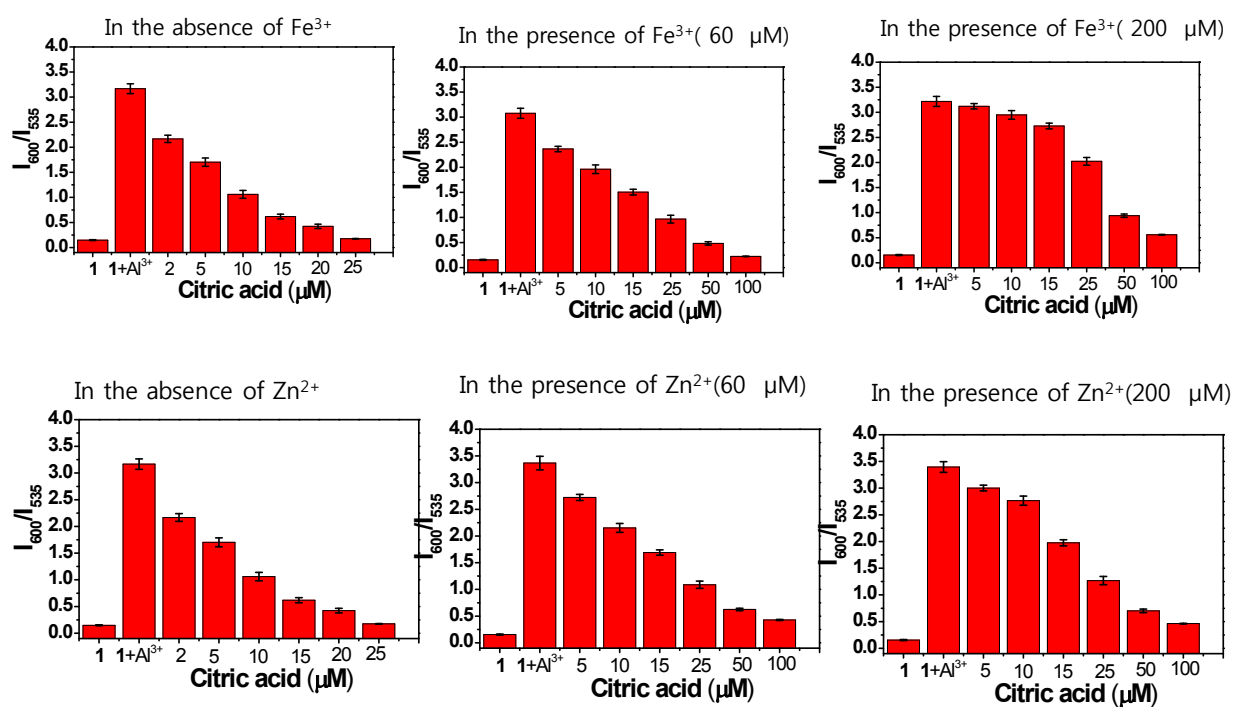

Fig. S24. Emission intensity ratio changes of **1** (5  $\mu\text{M}$ ) by  $\text{Al}^{3+}$  (12 equiv) in the presence of (a) citric acid with  $\text{Fe}^{3+}$  and (b) citric acid with  $\text{Zn}^{2+}$ .

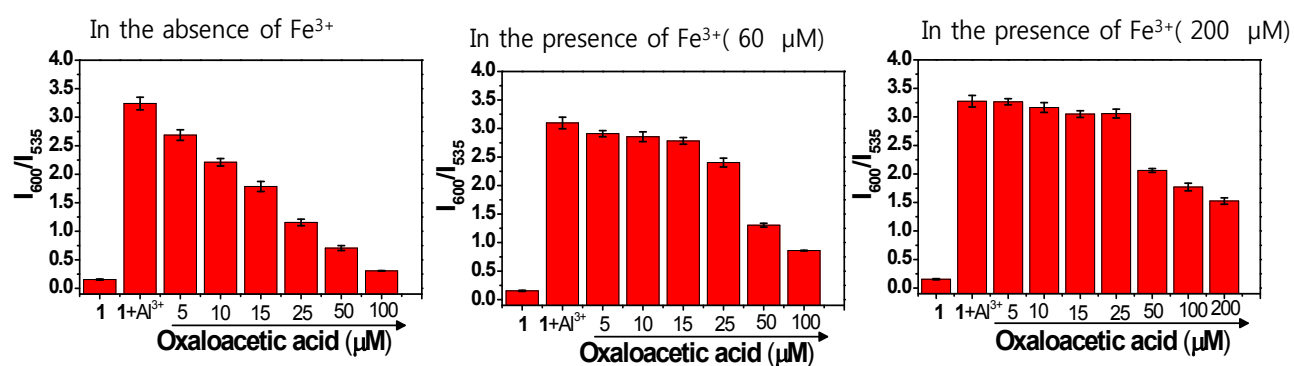

**Fig. S25.** Emission intensity ratio changes of **1** (5  $\mu\text{M}$ ) by  $\text{Al}^{3+}$  (12 equiv) in the presence of oxaloacetic acid and  $\text{Fe}^{3+}$ .



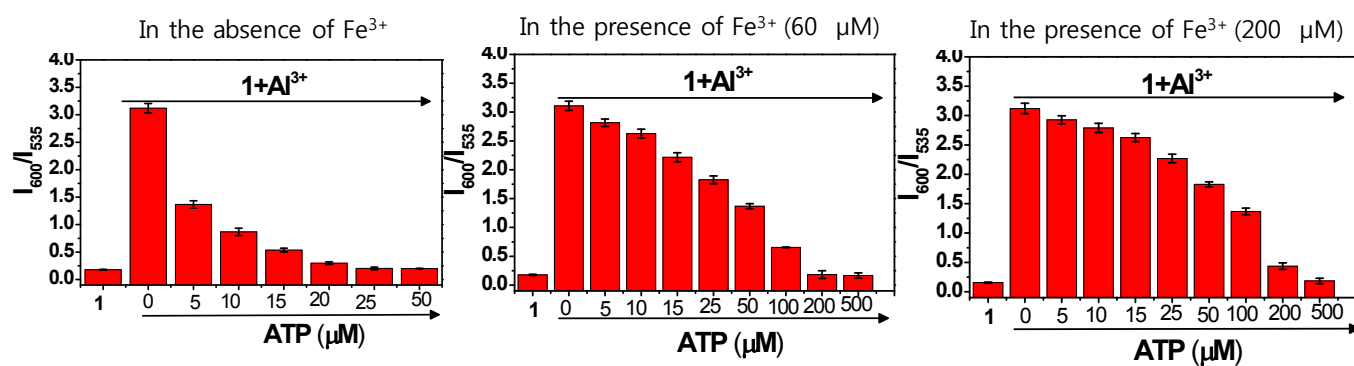

**Fig. S26.** Emission intensity ratio changes of **1** (5  $\mu\text{M}$ ) by  $\text{Al}^{3+}$  (12 equiv) in the presence of ATP and  $\text{Fe}^{3+}$ .

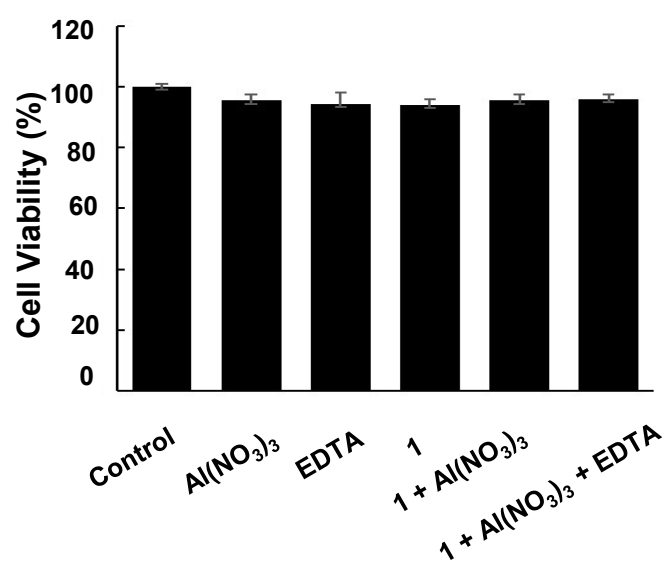

**Fig. S27.** MTT assay for the viability of MDA-MB-231 cells in DMEM 10% FBS treated with **1**, **1** + Al(NO<sub>3</sub>)<sub>3</sub> and **1** + Al(NO<sub>3</sub>)<sub>3</sub> + EDTA for 24 h. The results are based on three separate MTT assays. The concentration of **1**, Al(NO<sub>3</sub>)<sub>3</sub> and EDTA is 10 µM, 50 µM and 200 µM, respectively.

## References

- 1 G. L. Long and J. D. Winefordner, *Anal. Chem.*, 1983, **55**, 712A–724A.
- 2 R. Reddi, T. R. Guzman, R. M. Breece, D. L. Tierney and B. R. Gibney, *J. Am. Chem. Soc.*, 2007, **129**, 12815–12827.
- 3 H. Y. Lin, P. Y. Cheng, C. F. Wan and A. T. Wu, *Analyst*, 2012, **137**, 4415–4417.
- 4 A. Roy, S. Dey and P. Roy, *Sens. Actuators B*, 2016, **237**, 628–642.
- 5 L. Porres, A. Holland, L.-O. Palsson, A. P. Monkman, C. Kemp and A. Beeby, *J. Fluores.*, 2006, **16**, 267–272.
- 6 G. A. Vehar, A. V. Reddy and J. H. Freisheim, *Biochemistry*, 1976, **15**, 2512–2518.
